# Supplementary material for: From Gene to Transcript and Peptide: A Deep Overview on Non-Specific Lipid Transfer Proteins (nsLTPs)
Source: MDPI journal article supplement (doi:10.3390/antibiotics12050939), 2023-05-21

- (n21) *Arabidopsis thaliana* | species
- (n20) *Arabidopsis* | genus
- (n19) Camelinae | tribe
- (n18) Brassicaceae | family
- (n17) Brassicales | order
- (n16) Malvids | no rank
- (n15) Rosids | no rank
- (n14) Pentapetalae | no rank
- (n13) Gunneridae | no rank\*
- (n12) Eudicotyledons | no rank\*
- (n11) Mesangiospermae | no rank
- (n10) Magnoliopsida | class
- (n9) Spermatophyta | no rank\*
- (n8) Euphyllophyta | no rank\*
- (n7) Tracheophyta | no rank\*
- (n6) Embryophyta | no rank
- (n5) Streptophytina | subphylum\*
- (n4) Streptophyta | phylum\*
- (n3) Viridiplantae | kingdom\*
- (n2) Eukaryota | superkingdom
- (n1) Cellular organisms | no rank

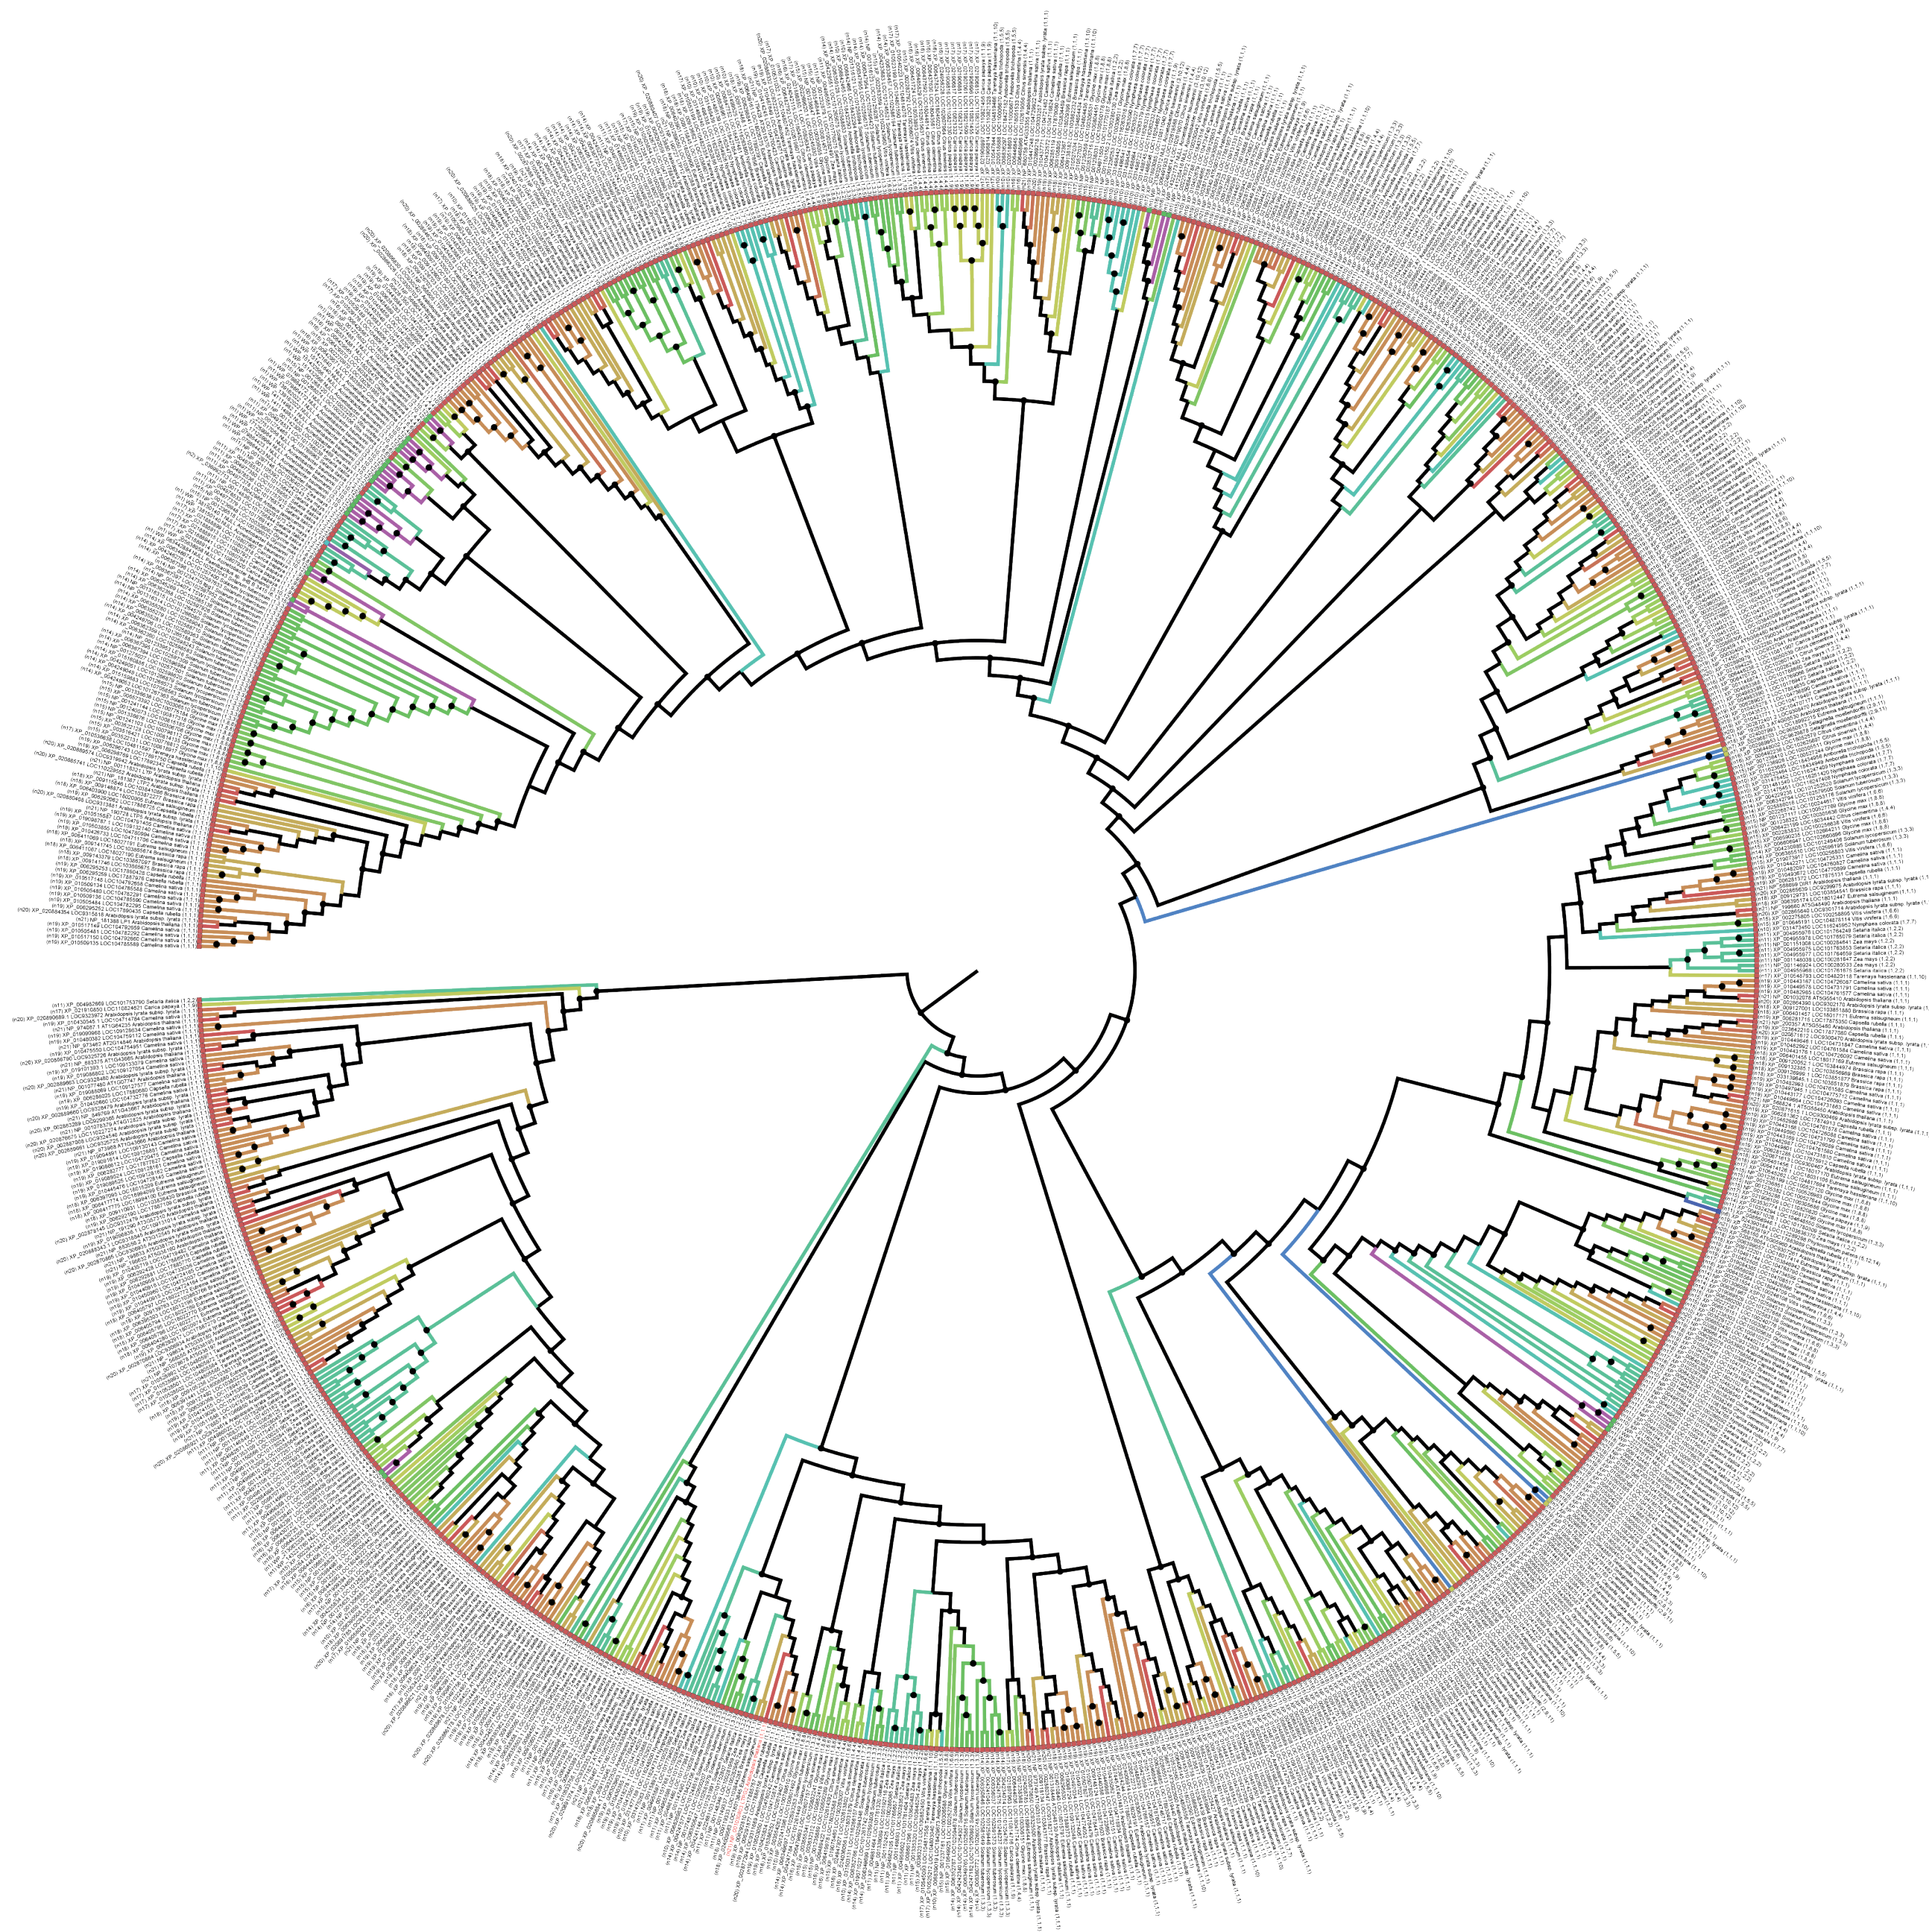

Supplement: s1 [file s1]
