# Supplementary figures and images for: From Gene to Transcript and Peptide: A Deep Overview on Non-Specific Lipid Transfer Proteins (nsLTPs)
Source: MDPI journal article supplement (doi:10.3390/antibiotics12050939), 2023-05-21

**A**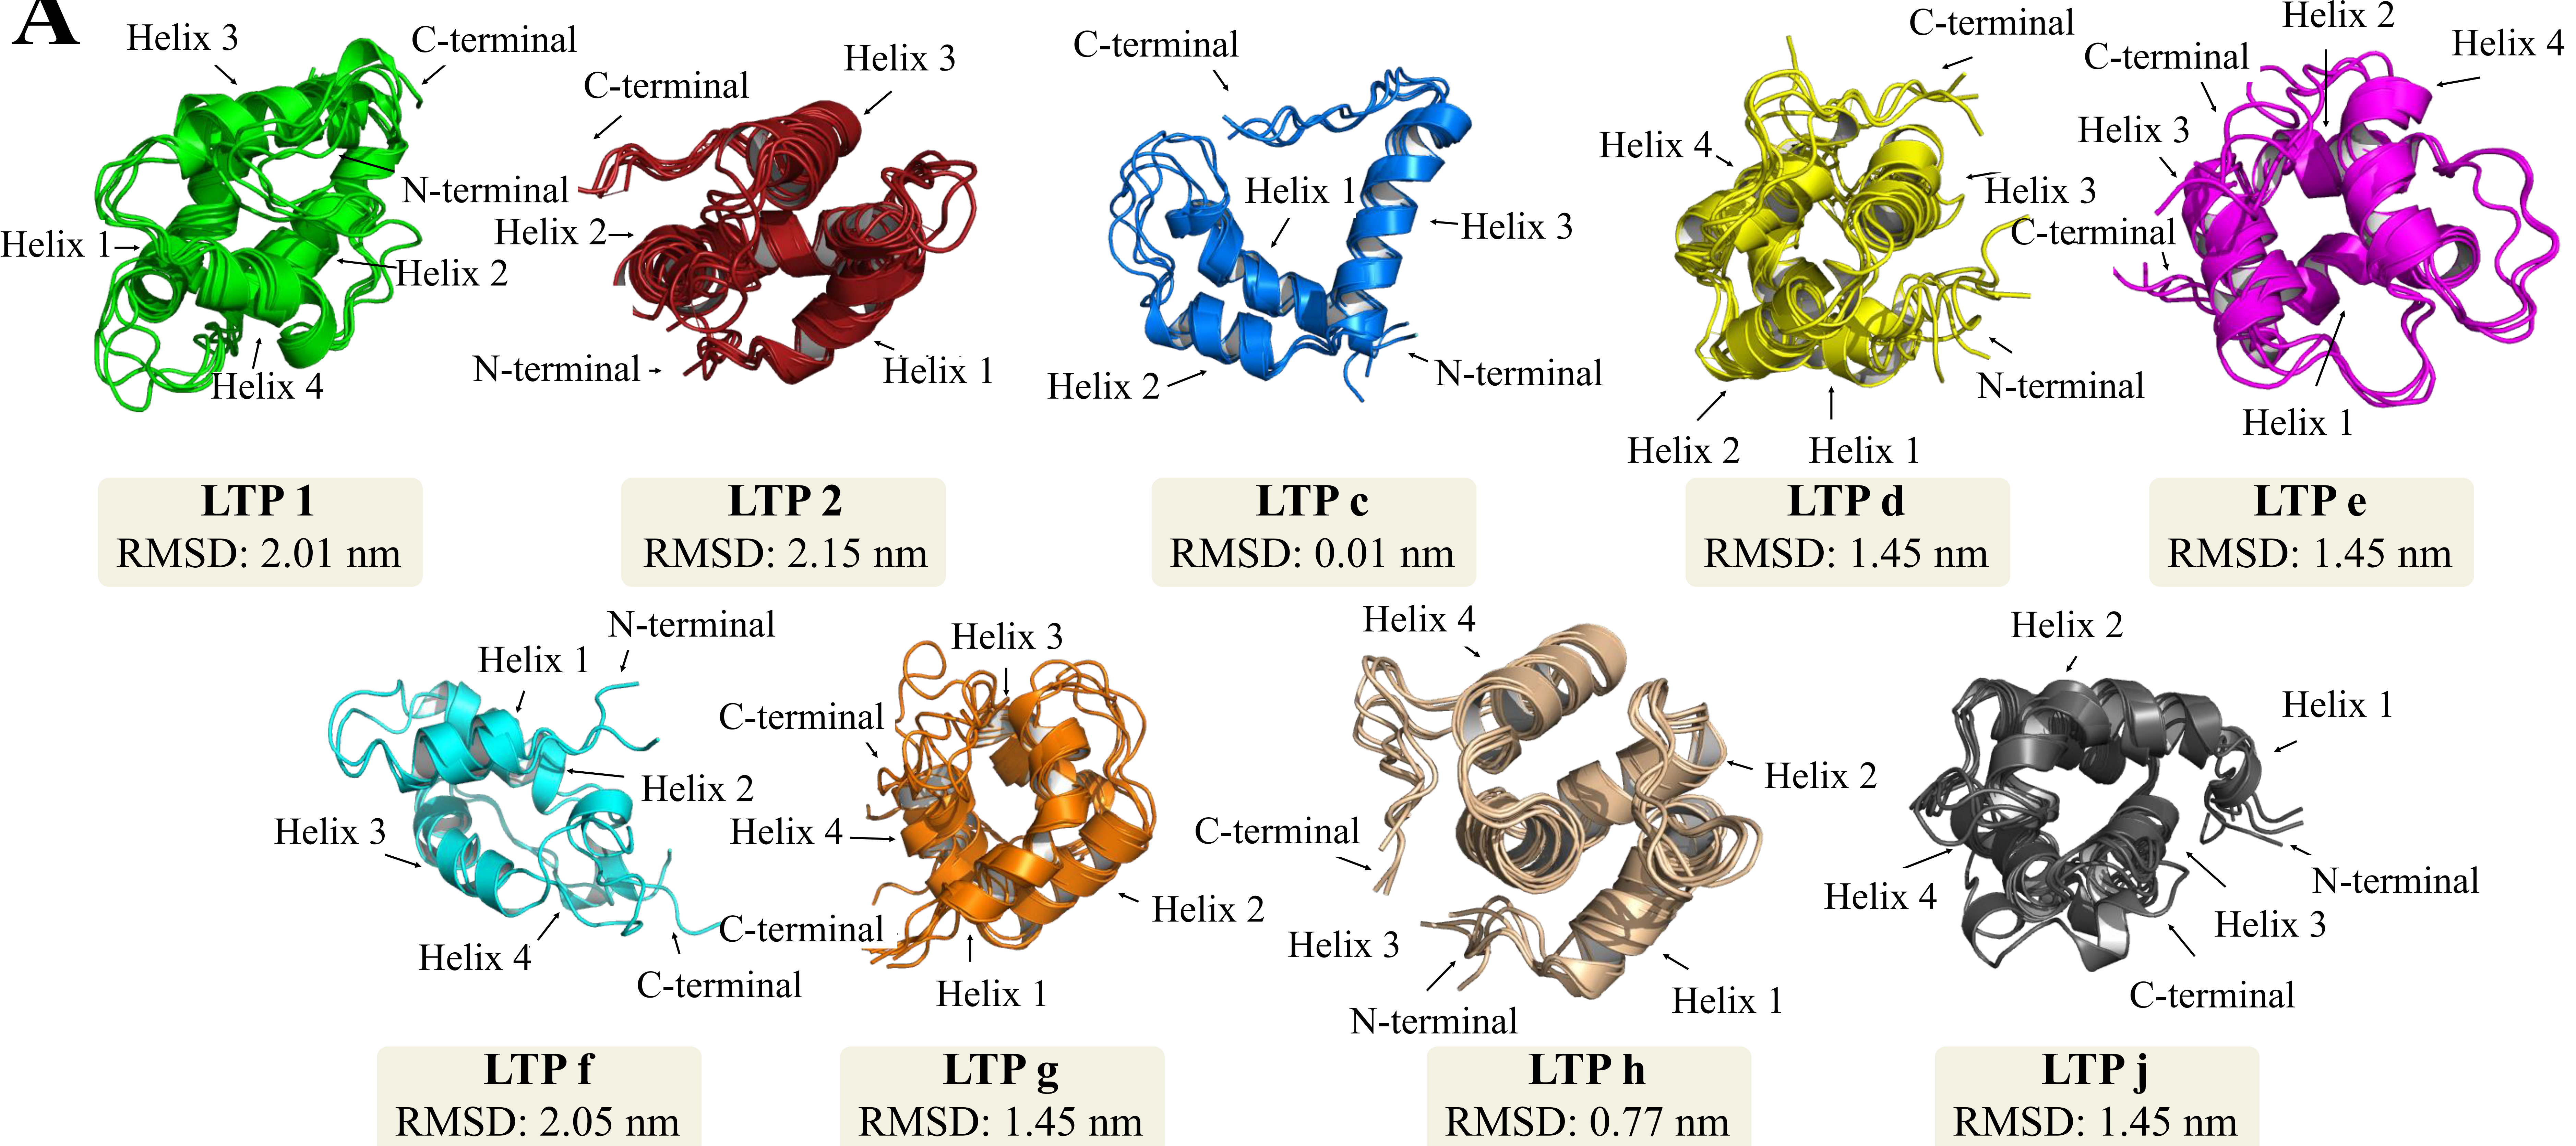**B**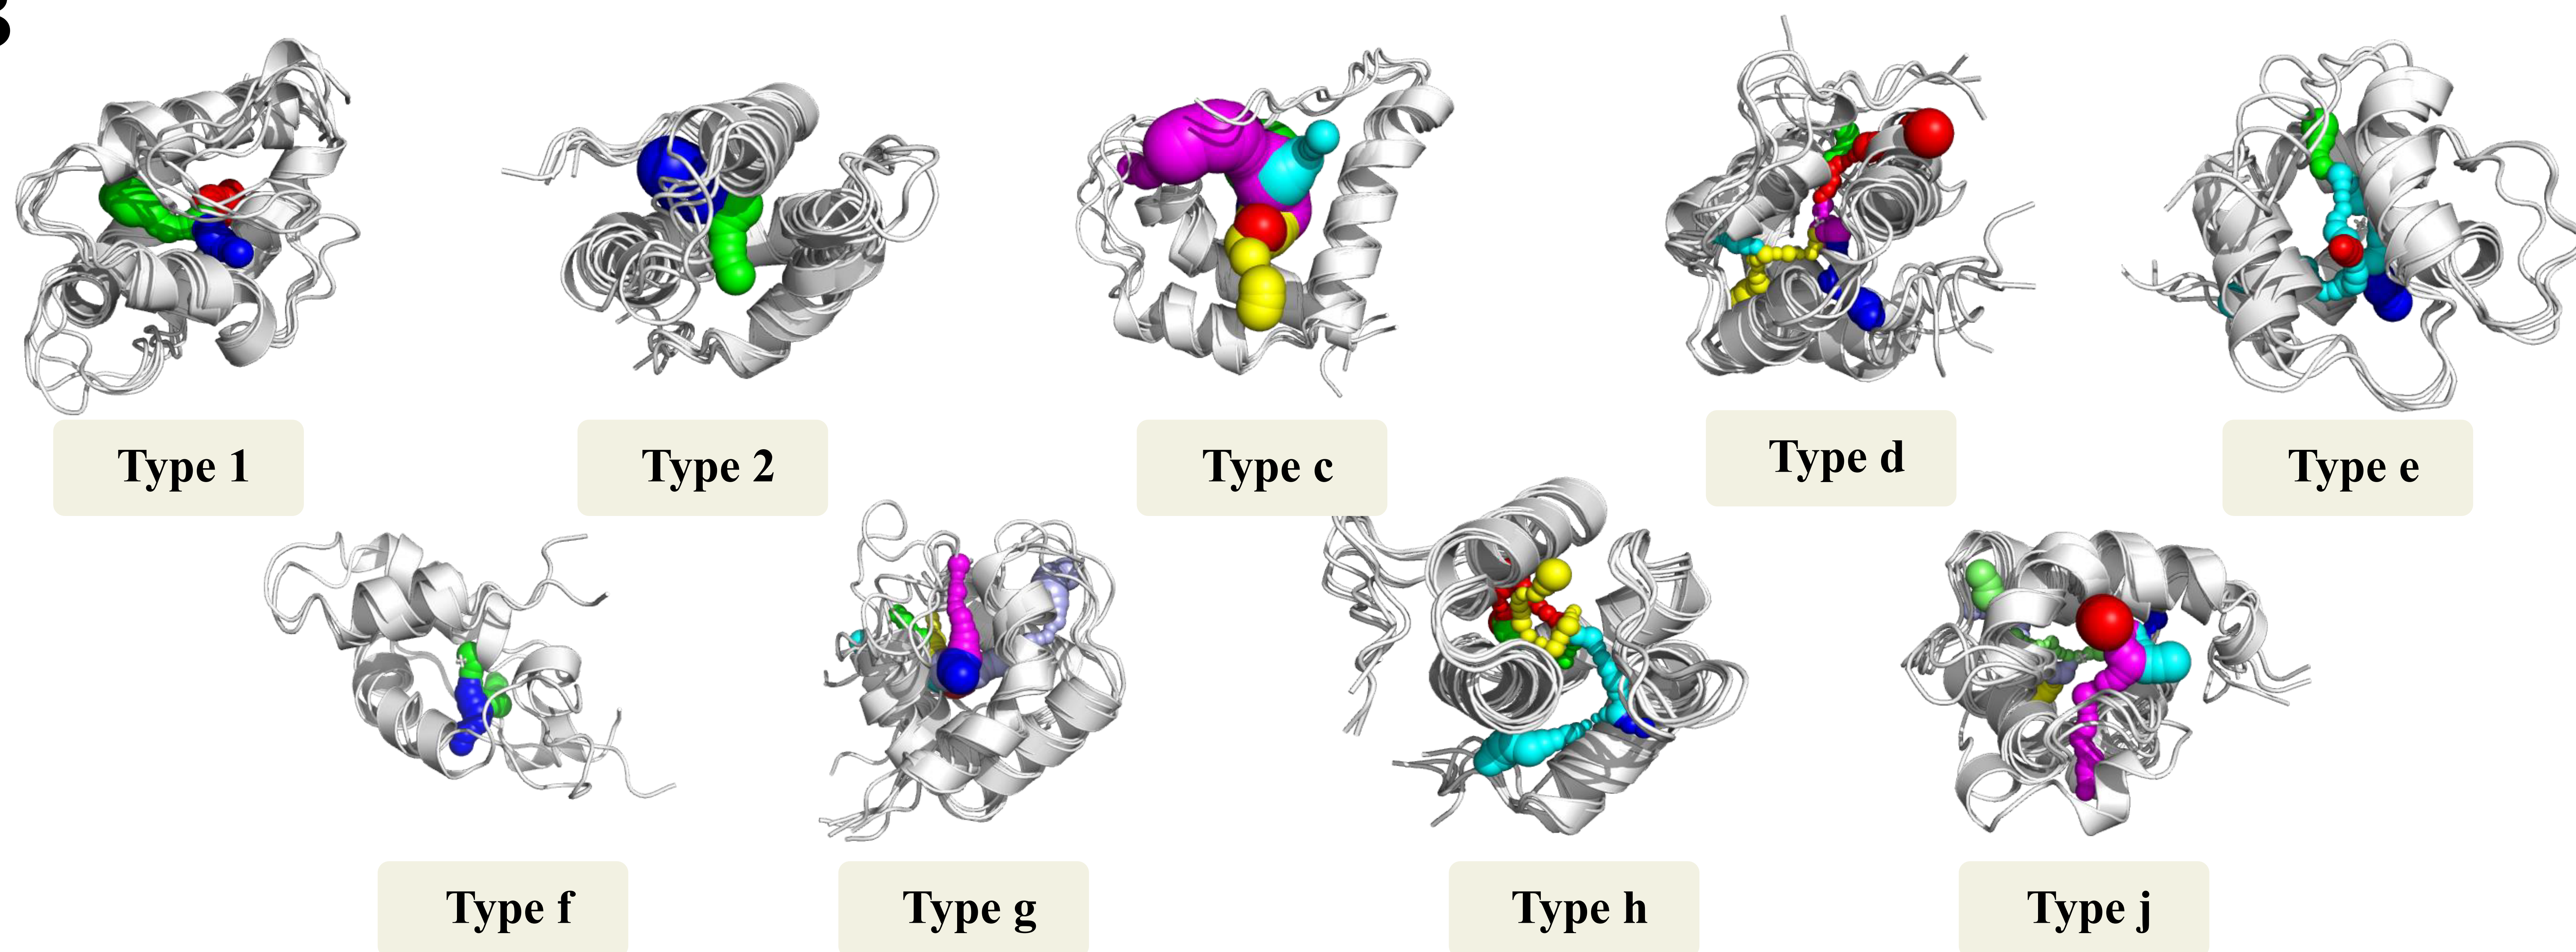

Supplement: s1 [file s1]

LTP1

LTP2

LTPg

LTPd

Unkown

LTPc

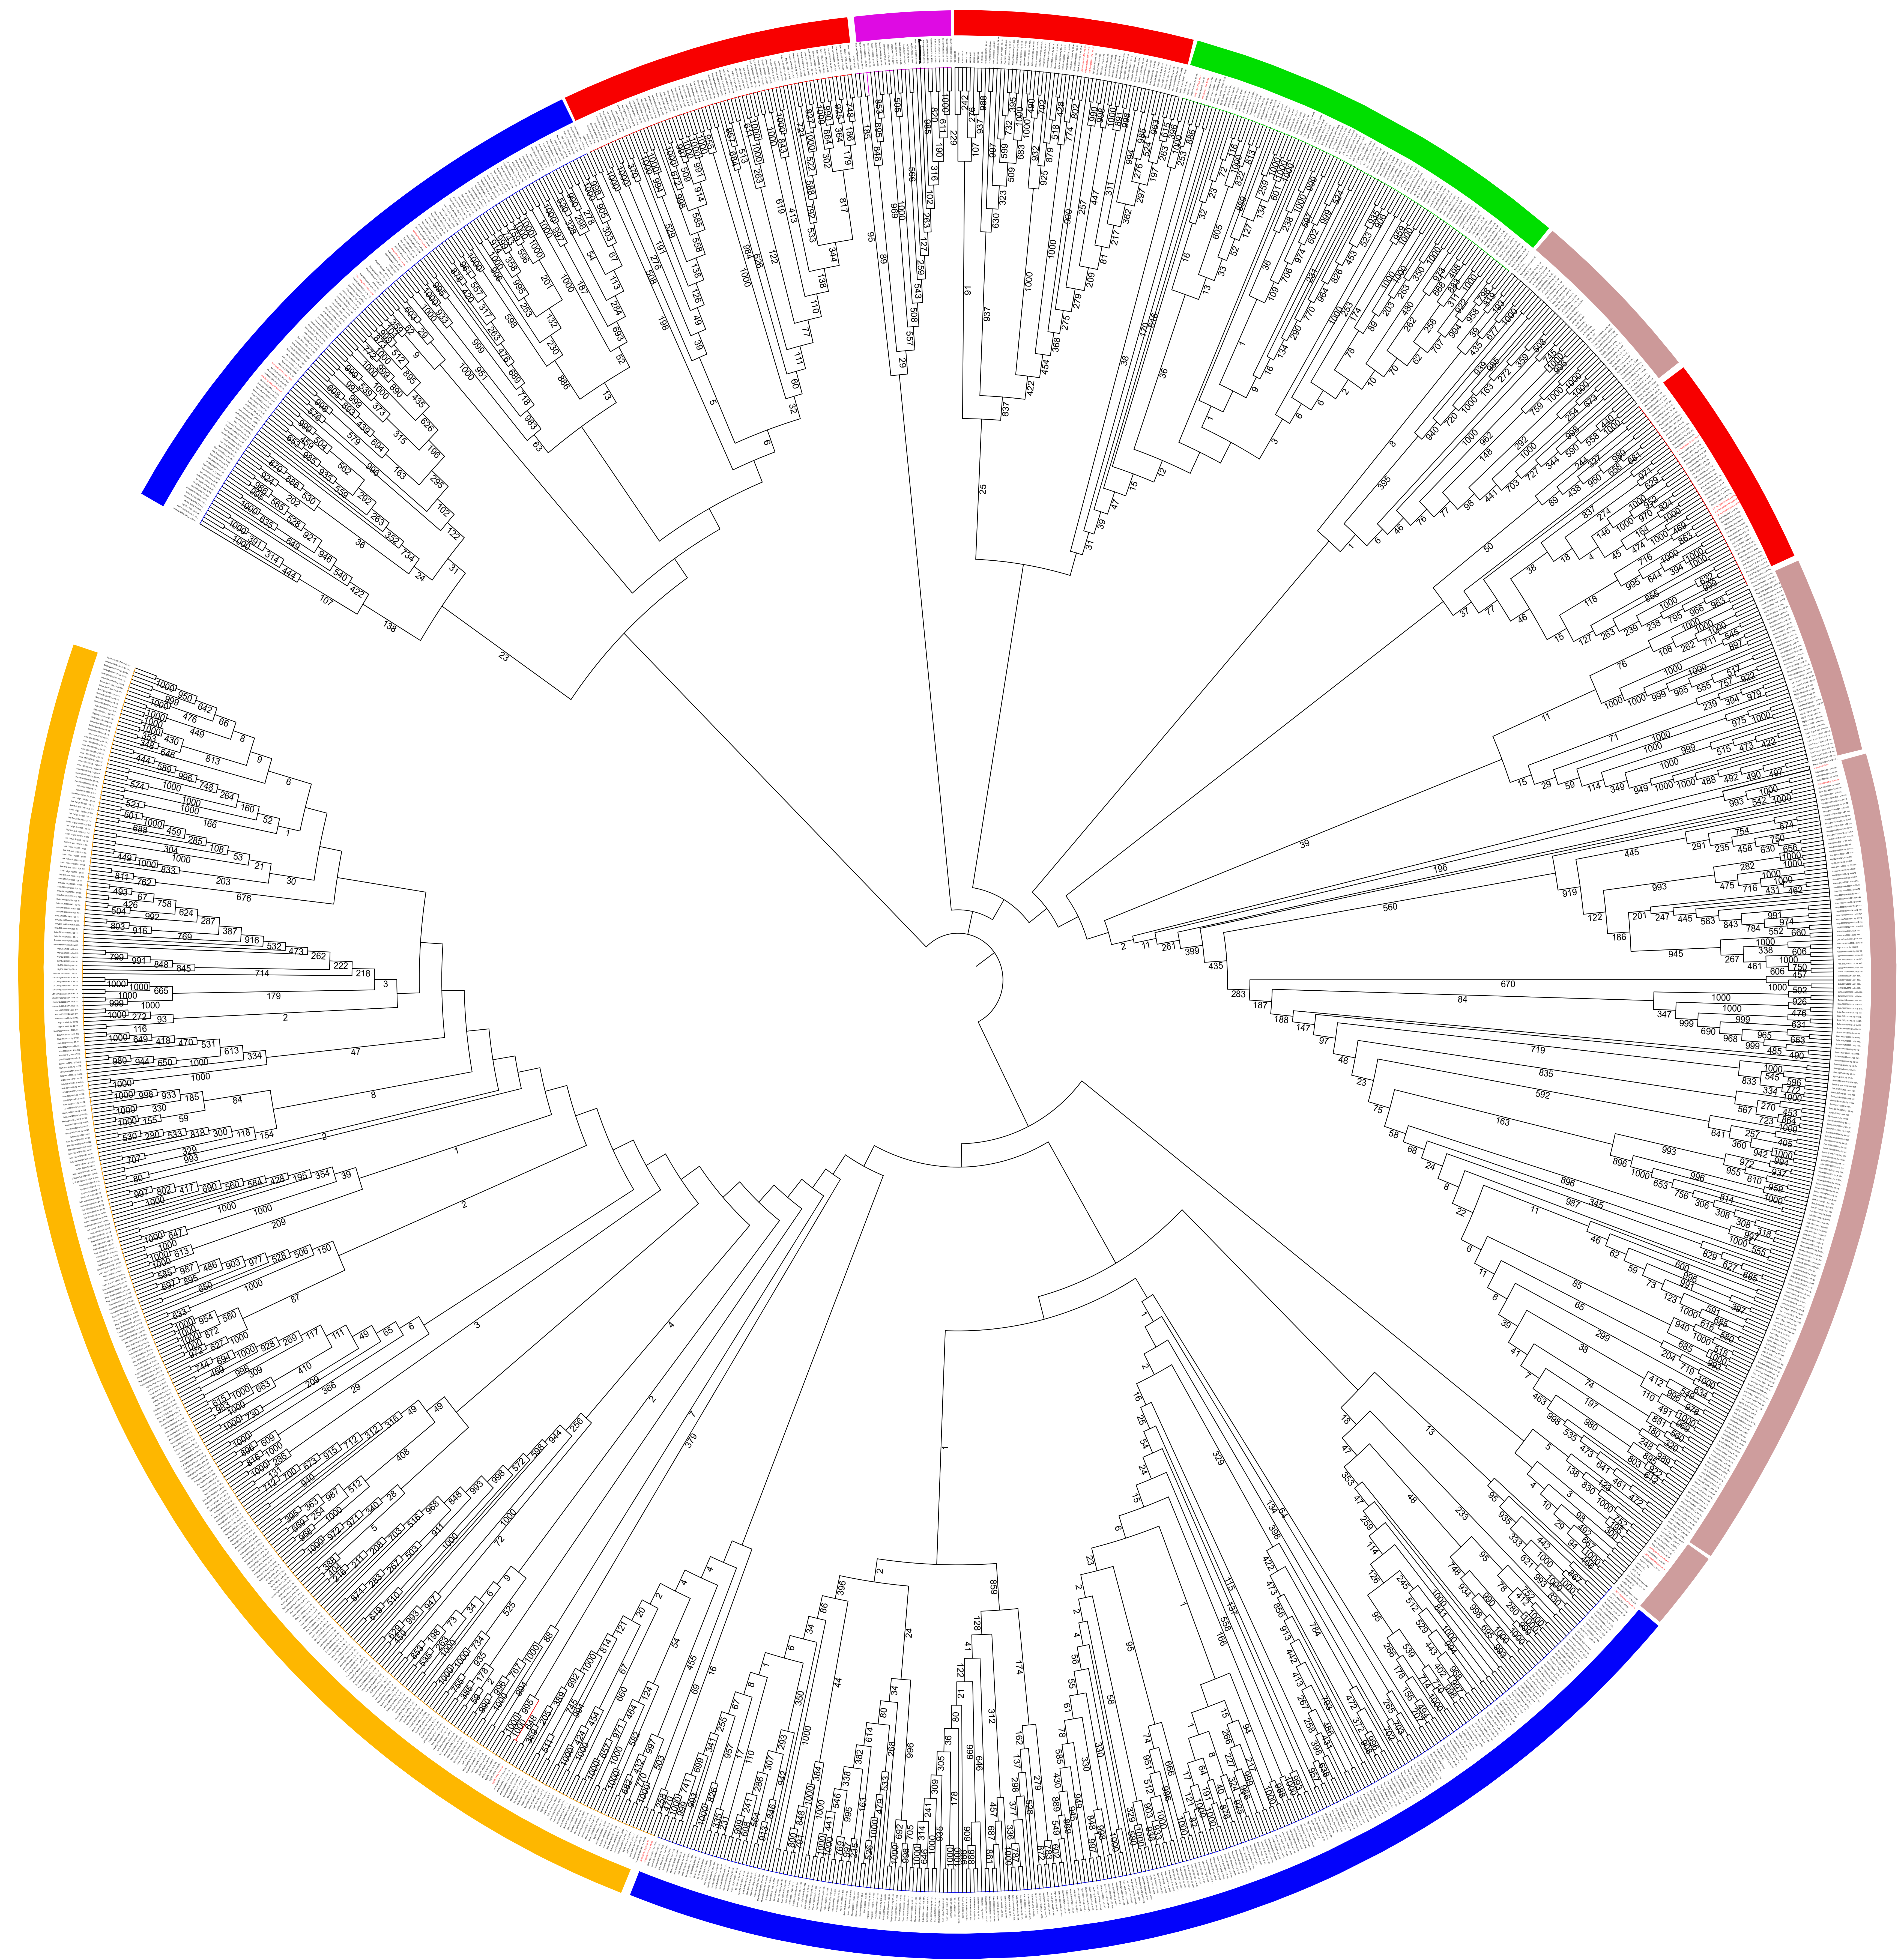

Supplement: s1 [file s1]

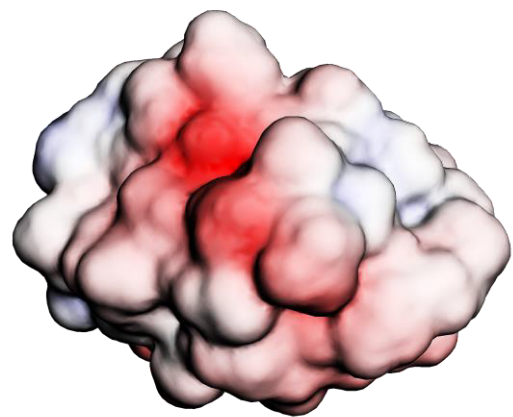

LTP1

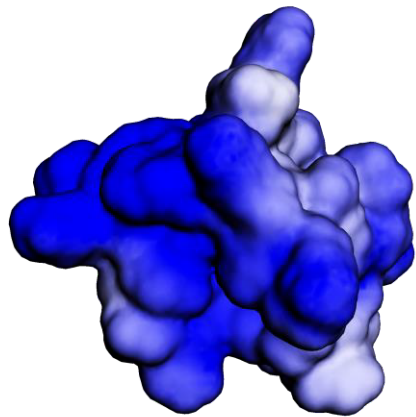

LTP2

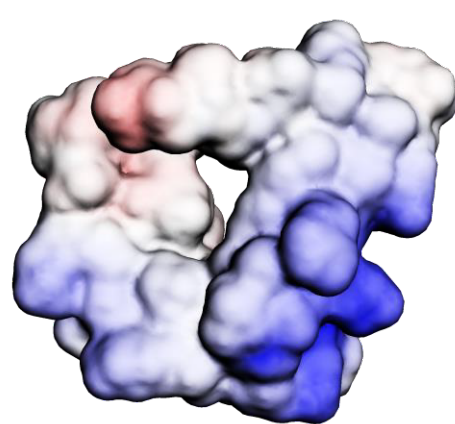

LTPc

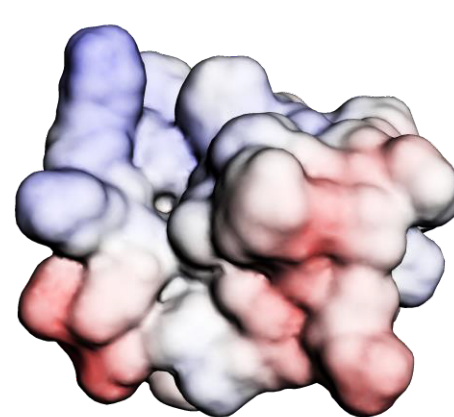

LTPd

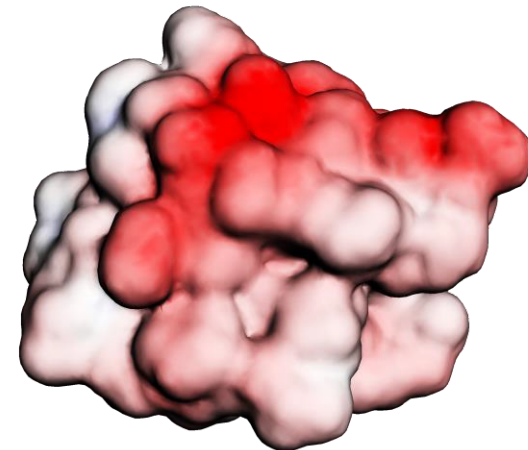

LTPe

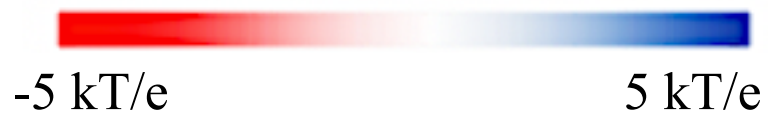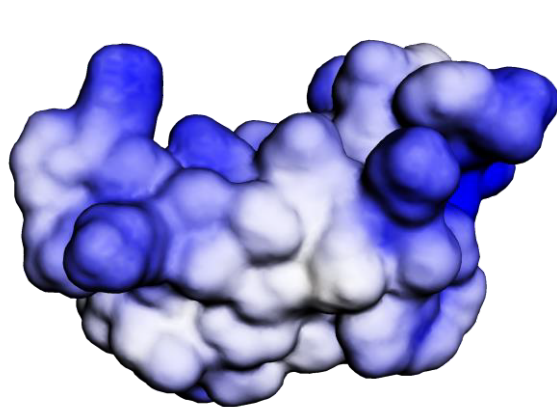

LTPf

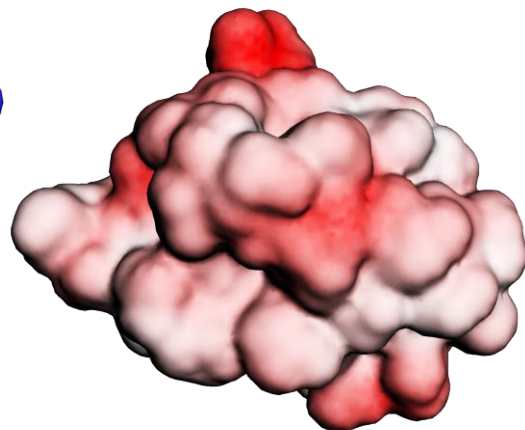

LTPg

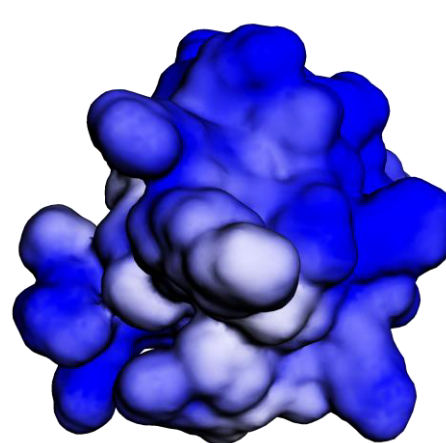

LTPh

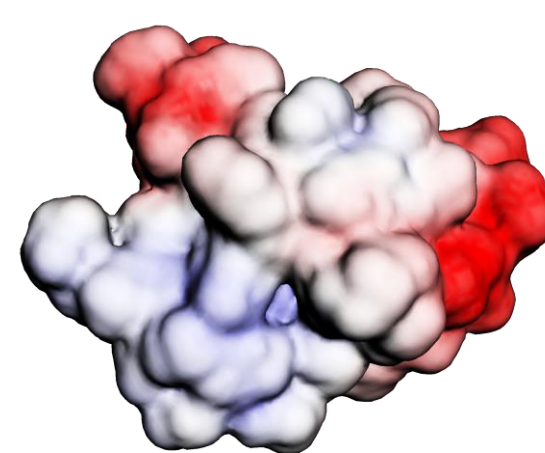

LTPj

Supplement: s1 [file s1]
